# Supplementary material for: Public Health Adaptation to Climate Change in Canadian Jurisdictions
Source: Int J Environ Res Public Health. 2015 Jan 12;12(1):623–51. doi: 10.3390/ijerph120100623 (PMC4306883; doi:10.3390/ijerph120100623)
Supplement: Supplementary File 1 [file ijerph-12-00623-s001.xlsx]

## Sheet: Initiatives
Jurisdiction	Jurisdiction Name	Region	Program, Project or Initiative Description	Document Year	Implementing Agency or Body	Adaptation Typology (Adapted from Biagani et al., 2014)						Health Risk Addressed	Stage	Consideration of Vulnerable Groups	Source	URL
					(or document author if implementing agency or body is unclear)	Capacity Building	Management, Planning and Policy	Practice and Behaviour	Information	Warning or observing systems	Vulnerability Assessment	(Adapted from Smith et al., 2014) (WNV = West Nile Virus; LD = Lyme Disease)	(1=groundwork; 2=adaptation action)			(if applicable)
Federal	Canada	n/a	Evaluation of the impacts of climate change on food and water safety and public health outcomes	2013	Public Health Agency of Canada				1			Food- and water-borne infectious diseases	1	No	Preventative Public Health Systems and Adaptation to a Changing Climate Program	http://www.phac-aspc.gc.ca/hp-ps/eph-esp/pph-psp-eng.php
Federal	Canada	n/a	Projected burden of Lyme disease in Ontario	2013	Public Health Agency of Canada				1			Vector-borne infectious diseases	1	No	Preventative Public Health Systems and Adaptation to a Changing Climate Program	http://www.phac-aspc.gc.ca/hp-ps/eph-esp/pph-psp-eng.php
Federal	Canada	n/a	Public health and water-borne illness research tool	2013	Public Health Agency of Canada				1			Food- and water-borne infectious diseases	1	No	Preventative Public Health Systems and Adaptation to a Changing Climate Program	http://www.phac-aspc.gc.ca/hp-ps/eph-esp/pph-psp-eng.php
Federal	Canada	n/a	Water, Air and Climate Change Bureau	2007	Health Canada		1		1			Multiple: Air quality and water quality	1	Not specified	About Health Canada	http://www.hc-sc.gc.ca/ahc-asc/branch-dirgen/hecs-dgsesc/sep-psm/waccb-beacc-eng.php
Federal	Canada	n/a	Pilot alert and response system to heat events	2010	Health Canada		1			1		Heat-related	2	Not specified	What's Being Done about Climate Change and Health in Canada - Adaptive Actions	http://www.hc-sc.gc.ca/ewh-semt/climat/adapt/actions-eng.php
Federal	Canada	n/a	Pilot alert and response system to infectious diseases	2010	Public Health Agency of Canada		1			1		Infectious diseases	2	Not specified	What's Being Done about Climate Change and Health in Canada - Adaptive Actions	http://www.hc-sc.gc.ca/ewh-semt/climat/adapt/actions-eng.php; http://www.tbs-sct.gc.ca/rpp/2010-2011/inst/doe/st-ts04-eng.asp#Theme:_Adaptation
Federal	Canada	n/a	Climate change infectious disease toolkit	2013	Public Health Agency of Canada	1						Infectious diseases	1	Not specified	Preventative Public Health Systems and Adaptation to a Changing Climate Program	http://www.phac-aspc.gc.ca/hp-ps/eph-esp/pph-psp-eng.php
Federal	Canada	n/a	Canadian assessment of vulnerabilities and adaptive capacity	2008	Health Canada						1	General Health	1	Yes	Human Health in a Changing Climate: A Canadian Assessment of Vulnerabilities and Adaptive Capacity
Federal	Canada	n/a	From Impacts to Adaptation (vulnerability assessment)	2008	Natural Resources Canada						1	General Health	1	Yes	From Impacts to Adaptation: Canada in a Changing Climate 2007
Federal	Canada	n/a	Climate Change and Health Adaptation Program	2010	Health Canada							General Health	1	Yes		http://www.tbs-sct.gc.ca/rpp/2010-2011/inst/doe/st-ts04-eng.asp#Theme:_Adaptation
Federal	Canada	n/a	Air quality and health index	2010	Health Canada and Environment Canada					1		Air Quality	2	Yes	Report of the Commissioner of the Environment and Sustainable Development to the House of Commons
Federal	Canada	n/a	Heat risk guidelines for health care workers and health administrators	2011	Health Canada	1						Heat-related	1	Yes	Extreme Heat Events Guidelines: User Guide for Health Care Workers and Health Administrators
Federal	Canada	n/a	Heat Risk technical guide for health care workers	2011	Health Canada	1						Heat-related	1	Yes	Extreme Heat Events Guidelines: Technical Guide for Health Care Workers
Federal	Canada	n/a	Climate Change Adaptation Program (CCAP)	2012	Aboriginal Affairs and Northern Development Canada	1						General Health	1	Yes	Climate Change Adaptation Program	http://www.aadnc-aandc.gc.ca/eng/1329158189051/1329158264671
Federal	Canada	n/a	Heat alert and response systems best practices guidebook	2012	Health Canada	1						Heat-related	1	Yes	Heat Alert and response Systems to Protect Health: Best Practices Guidebook
Federal	Canada	n/a	Assessment of the burden of AGI and adaptation to climate change in the Canadian North	2013	Public Health Agency of Canada				1			Food- and water-borne infectious diseases	1	Yes	Preventative Public Health Systems and Adaptation to a Changing Climate Program	http://www.phac-aspc.gc.ca/hp-ps/eph-esp/pph-psp-eng.php
Federal	Canada	n/a	Assess vulnerabilities and health impacts of climate change amount Northern/Inuit populations	2010	Health Canada						1	General Health	1	Yes (Northern/Inuit populations)	What's Being Done about Climate Change and Health in Canada - Adaptive Actions	http://www.hc-sc.gc.ca/ewh-semt/climat/adapt/actions-eng.php
Federal	Canada	n/a	Heat Risk Adaptation Guideline for public health and emergency management officials	2011	Health Canada	1						Heat-related	1	Yes (older adults; infants and young children; people with chronic illness or who are physically impaired; socially disadvantaged individuals and communities; newcomers to Canada and transient populations such as tourists; occupational groups; the physically active)	Communicating the Health Risks of Extreme heat Events: Toolkit for Public Health and Emergency Management Officials
Federal	Canada	n/a	Assist Northerners in assessing key vulnerabilities and opportunities (Part of CAA)	2009	Aboriginal Affairs and Northern Development Canada						1	General Health	1	Yes	Implementation Evaluation of INAC Climate Change Adaptation Program: Assist Northerners in Assessing Key Vulnerabilities and Opportunities	http://www.aadnc-aandc.gc.ca/eng/1307024581995/1307024620213
Federal	Canada	n/a	Climate Change Scenarios Program (Part of CAA)	2011	Environment Canada				1			General Health	1	n/a	Evaluation of the Improved Climate Change Scenarios Program	http://www.ec.gc.ca/ae-ve/default.asp?lang=En&n=4CCFD0E2-1
Federal/Territorial	Canada	n/a	Healthy Foods North	2008	NWT Department of Health and Social Servies (HSS), Government of Nunavut, Public Health Agency of Canada	1		1				Food Security	2	Yes	NWT Climate Change Impacts and Adaptation Report
Federal/Territorial	Northwest Territories	Northern	Healthy Foods North	2008	NWT Department of Health and Social Servies (HSS), Government of Nunavut, Public Health Agency of Canada	1		1				Food Security	2	Yes	NWT Climate Change Impacts and Adaptation Report
Federal/Territorial	Nunavut	Northern	Healthy Foods North	2008	NWT Department of Health and Social Servies (HSS), Government of Nunavut, Public Health Agency of Canada	1		1				Food Security	2	Yes	NWT Climate Change Impacts and Adaptation Report
Provincial	British Columbia	BC	BC Air Action Plan	2009	BC Government		1					Air Quality	2	No	BC Air Action Plan	http://www.bcairsmart.ca/
Provincial	British Columbia	BC	Coastal Flood Hazard Area Mapping	2012	BC Ministry of Forests, Lands and Natural Resource Operations				1			Floods	1	Not specified	Coastal Flood Hazard Areas In British Columbia	http://www.env.gov.bc.ca/wsd/public_safety/flood/pdf_drawings/index.html
Provincial	Manitoba	Prairies	Working with municipalities to establish local emergency management to prepare for extreme weather events	2008	Government of Manitoba		1					General Health	1		Adapting to Climate Change: Preparing for the Future
Provincial	Manitoba	Prairies	Increasing the speed and effectiveness of local and regional emergency response measures	2008	Government of Manitoba		1					General Health	1		Adapting to Climate Change: Preparing for the Future
Provincial	New Brunswick	Atlantic	Flood Hazard Mapping	2014	Government of New Brunswick				1			Floods	1	Not specified	Climate Change Action Plan 2014-2020
Provincial	New Brunswick	Atlantic	Assess public health risks associated with a changing climate	2014	Government of New Brunswick						1	General Health	1	Not specified	Climate Change Action Plan 2014-2020
Provincial	New Brunswick	Atlantic	Work towards fully integrated emergency management system that takes climate change impacts into account	2007	Government of New Brunswick		1					General Health	1	Not specified	Climate Change Action Plan 2007-2012
Provincial	Newfoundland and Labrador	Atlantic	Raise the profile of climate change and health among public health professionals	2005	Department of Environment and Conservation	1						General Health	1	No	Climate Change Action Plan 2005
Provincial	Newfoundland and Labrador	Atlantic	Surveillance of infectious diseases (in particular, West Nile Virus)	2005	Department of Environment and Conservation					1		Infectious diseases	2	No	Climate Change Action Plan 2005
Provincial	Newfoundland and Labrador	Atlantic	Flood risk mapping	2014	Department of Environment and Conservation				1			Floods	1	No	Flood risk mapping studies	http://www.env.gov.nl.ca/env/waterres/flooding/frm.html
Provincial	Newfoundland and Labrador	Atlantic	Climate Change Action Plan 2005	2005	Department of Environment and Conservation		1					General Health	1	Yes	Climate Change Action Plan 2005
Provincial	Newfoundland and Labrador	Atlantic	Flood alert systems	2013	Government of Newfoundland & Labrador					1		Floods	2	Not specified	Enhancing Reslience to Climate Change	http://www.turnbackthetide.ca/government-action/resilience-to-climate-change.shtml#.VDVYfBaK3eI
Provincial	Newfoundland and Labrador	Atlantic	Conference on climate change and health to raise the profile of the impacts of climate change on public health	2006	Government of Newfoundland & Labrador	1						General Health	2	Not specified	Charting our Course: Climate Change Action Plan 2011
Provincial	Nova Scotia	Atlantic	Lyme Disease surveillance	2012	NS Health and Wellness					1		Vector-borne infectious diseases (LD)	2	No	Lyme Disease: A Report on Lyme Disease Epidemiology and Surveillance in Nova Scotia
Provincial	Nova Scotia	Atlantic	Vulnerability Assessment	2005	Government of Nova Scotia						1	General Health	1	Yes	Adapting to a Changing Climate in Nova Scotia: Vulnerability Assessment and Adaptation Options
Provincial	Nova Scotia	Atlantic	Air quality health index	2009	Nova Scotia Department of Environment					1		Air Quality	2	Yes (the old and the very young)	Toward a Greener Future: Nova Scotia's Climate Change Action Plan
Provincial	Nova Scotia	Atlantic	Climate Change Adaptation plan	2009	Nova Scotia Department of Environment		1					Air Quality	1		Toward a Greener Future: Nova Scotia's Climate Change Action Plan
Provincial	Ontario	Ontario	Air Quality Index	2011	Government of Ontario					1		Air Quality	2	No	Climate Ready: Ontario's Adaptation Strategy and Action Plan 2011-2014
Provincial	Ontario	Ontario	Increased awareness about the health risk factors of climate change through legislation and awareness activities	2011	Government of Ontario	1	1					General Health	2	No	Climate Ready: Ontario's Adaptation Strategy and Action Plan 2011-2014
Provincial	Ontario	Ontario	Raise public awareness of Lyme disease	2011	Government of Ontario	1						Vector-borne infectious diseases	2	No	Climate Ready: Ontario's Adaptation Strategy and Action Plan 2011-2014
Provincial	Ontario	Ontario	Adaptation strategy and action plan	2011	Government of Ontario		1					General Health	2	Yes	Climate Ready: Ontario's Adaptation Strategy and Action Plan 2011-2014
Provincial	Prince Edward Island	Atlantic	Catastrophe planning (storm and tidal surges, severe storms, other extreme weather events)	2009	Government of Prince Edward Island		1					Storms	2	No	Prince Edward Island and Climate Change: A Strategy for Reducing the Impacts of Global Warming
Provincial	Prince Edward Island	Atlantic	Climate change adaptation plan	2009	Government of Prince Edward Island		1					Storms	1	No	Prince Edward Island and Climate Change: A Strategy for Reducing the Impacts of Global Warming
Provincial	Quebec	Quebec	Coastal communities adaptation to coastal erosion	2008	Government of Quebec		1					Floods	1	No	Quebec and Climate change: A Challenge for the Future 2006-2012 Action Plan (Updated)
Provincial	Quebec	Quebec	Research flooding in Quebec	2008	Government of Quebec				1			Floods	1	No	Quebec and Climate change: A Challenge for the Future 2006-2012 Action Plan (Updated)
Provincial	Quebec	Quebec	SUPREME System - Monitoring and surveillance system for public health	2011	Qubec National Institute for Public Health					1		Multiple: Floods, heat-related, cold-related, storms	2	No	SUPREME System journal article	http://www.ij-healthgeographics.com/content/10/1/39
Provincial	Quebec	Quebec	Development of an interactive atlas of health vulnerabilities to climate change	2008	Ouranos				1			General Health	1	Not specified	Les effets des changements climatiques sur la santé au Québec
Provincial	Quebec	Quebec	Establishment of expert panels to assess measures needed for climate change adaptation	2008	Ouranos		1					General Health	1	Not specified	Les effets des changements climatiques sur la santé au Québec
Provincial	Quebec	Quebec	Estimate and model future levels of smog	2008	Ouranos				1			Air Quality	1	Not specified	Les effets des changements climatiques sur la santé au Québec
Provincial	Quebec	Quebec	Identification of urban areas vulnerable to intense heat	2008	Ouranos				1			Heat-related	1	Not specified	Les effets des changements climatiques sur la santé au Québec
Provincial	Quebec	Quebec	Improved monitoring of infectious diseases	2008	Government of Quebec					1		Infectious diseases	2	Not specified	Quebec and Climate change: A Challenge for the Future 2006-2012 Action Plan (Updated)
Provincial	Quebec	Quebec	Monitoring, surveillance and warning system for intense heat	2008	Government of Quebec					1		Heat-related	2	Not specified	Quebec and Climate change: A Challenge for the Future 2006-2012 Action Plan (Updated)
Provincial	Quebec	Quebec	Research on historical morbidity and hospital visits according to historical temperatures and simulated for estimated future temperatures	2008	Ouranos				1			Heat-related	1	Not specified	Les effets des changements climatiques sur la santé au Québec
Provincial	Quebec	Quebec	Short and long term epidemiological monitoring system for physical and psychosocial health problem related to extreme climate events	2008	Government of Quebec				1			Multiple: Floods, storms, heat-related	2	Not specified	Quebec and Climate change: A Challenge for the Future 2006-2012 Action Plan (Updated)
Provincial	Quebec	Quebec	Training sessions for public health, clinic service and civil protection personnel concerning infectious diseases and emerging health problems	2008	Government of Quebec	1						Infectious diseases	1	Not specified	Quebec and Climate change: A Challenge for the Future 2006-2012 Action Plan (Updated)
Provincial	Quebec	Quebec	Use flooding research results to map restricted development zones, prepare regulations and civil security plans	2008	Government of Quebec		1					Floods	2	Not specified	Quebec and Climate change: A Challenge for the Future 2006-2012 Action Plan (Updated)
Provincial	Quebec	Quebec	Water management feasibility study	2008	Ouranos				1			Food- and water-borne infectious diseases	1	Not specified	Les effets des changements climatiques sur la santé au Québec
Provincial	Quebec	Quebec	Requiring Regional Emergency Heat Wave Strategies	2008	Government of Quebec		1					Heat-related	1	Not specified, may or may not be considered in regional plans	Quebec and Climate change: A Challenge for the Future 2006-2012 Action Plan (Updated)
Provincial	Quebec	Quebec	Climate change adaptation plan	2008	Government of Quebec		1					General Health	1	Yes	Quebec and Climate change: A Challenge for the Future 2006-2012 Action Plan (Updated)
Provincial	Quebec	Quebec	Financial support for urban cool zones and strategic air conditioning	2008	Government of Quebec							Heat-related	1	Yes (elderly)	Quebec and Climate change: A Challenge for the Future 2006-2012 Action Plan (Updated)
Provincial	Quebec	Quebec	Analyze incidence and distribution of GI disease in at-risk populations and risk factors associated with climate change	2008	Ouranos				1			Food- and water-borne infectious diseases	1	Yes (populations at risk)	Les effets des changements climatiques sur la santé au Québec
Provincial	Quebec	Quebec	Guide for health network administrators: "Changements climatiques: vulnérabilité et adaptation des immeubles"	2011	Ministere de la Santé et des Services Sociaux	1						General Health	1	Not specified	Changements climatiques: Vulnérabilité et adaptation des immeubles
Provincial	Quebec	Quebec	Revise emergency plans	2012	Government of Quebec		1					General Health	1	Not specified	Quebec in Action: Greener by 2020 - 2013-2020 Government Strategy fo Climate Change Adaptation
Provincial	Quebec	Quebec	Support the training of specialized teams and implementing financial incentive measures to help eliminate urban heat islands in municipalities	2012	Government of Quebec	1						Heat-related	1	Yes (elderly and others - not specified)	Quebec in Action: Greener by 2020 - 2013-2020 Climate Change Action Plan
Provincial	Quebec	Quebec	Voluntary standard to plan public parking lots to reduce urban heat islands	2012	Government of Quebec		1					Heat-related	1	No	Quebec in Action: Greener by 2020 - 2013-2020 Climate Change Action Plan
Provincial	Quebec	Quebec	Enhancement of information and training tools and methods intended for the general public, organizations, medical staff and elected officials	2012	Government of Quebec	1						Multiple: Floods, storms	1	Not specified	Quebec in Action: Greener by 2020 - 2013-2020 Climate Change Action Plan
Provincial	Quebec	Quebec	Evaluate relevance and feasibility of establishing a monitoring system focusingo nt he psychosocial impact of extreme weather events	2012	Government of Quebec				1			Multiple: Floods, storms	1	Not specified	Quebec in Action: Greener by 2020 - 2013-2020 Climate Change Action Plan
Provincial	Quebec	Quebec	Air Quality Policy (promoting local and regional air quality management)	2012	Government of Quebec		1					Air Quality	2	Not specified	Quebec in Action: Greener by 2020 - 2013-2020 Climate Change Action Plan
Provincial	Quebec	Quebec	Launch of "Mon climat, ma santé" website to disseminate accessible information	2012	Ministere de la Santé et des Services Sociaux	1						General Health	2	Yes (chronic health conditions, young, elderly, low SES, socially isolated, people who work outdoors)	Quebec in Action: Greener by 2020 - 2013-2020 Government Strategy fo Climate Change Adaptation
Provincial	Quebec	Quebec	Upgrade the physical buildings of health establishments to allow them to function independently over extended periods of time	2012	Government of Quebec			1				General Health	2	No	Quebec in Action: Greener by 2020 - 2013-2020 Government Strategy fo Climate Change Adaptation
Provincial	Quebec	Quebec	Personalized, automated warning systems (by telephone and internet) for vulnerable individuals	2012	Government of Quebec			1				Heat-related	2	Yes (group not specified)	Quebec in Action: Greener by 2020 - 2013-2020 Climate Change Action Plan
Provincial	Quebec	Quebec	Elaborate legislation governing land-use planning and urban planning to prevent the appearance of new urban heat islands	2012	Government of Quebec		1					Heat-related	2	No	Quebec in Action: Greener by 2020 - 2013-2020 Climate Change Action Plan
Provincial	Quebec	Quebec	Enhance assistance and psychosocial support measures following disasters (freezing rain, high tides, flooding)	2012	Government of Quebec			1				Multiple: Floods, storms	2	Not specified	Quebec in Action: Greener by 2020 - 2013-2020 Climate Change Action Plan
Provincial	Quebec	Quebec	Plan d'intervention gouvernemental 2013-2015 pour la protection de la pouplation contre le virus du Nil occidental	2013	Ministere de la Santé et des Services Sociaux		1					Vector-borne infectious diseases	1	Not specified	Plan d'intervention gouvernemental 2013-2015 pour la protection de la pouplation contre le virus du Nil occidental
Regional	Prairies	Prairies	Adaptability of Prairie Cities: The Role of Climate Current and Future Impacts and Adaptation Strategies	2001	Praries Adaptation Research Collaborative						1	General Health	1	Yes	Adaptability of Prairie Cities: The Role of Climate Current and Future Impacts and Adaptation Strategies
Regional	Prairies	Prairies	Health Vulnerability Assessment Feasibility Study and Round Table	2001	Praries Adaptation Research Collaborative				1			General Health	1	Yes	A Feasibility Assessment to Study Societal Adaptation and Human Health Impacts Under Various Future climate Scenarios Anticipated in the Canadian Prairies
Regional	Prairies	Prairies	Isi Askiwan - The State of the Land: Prince Albert Grand Council Elders' Forum on Climate Change	2005	Praries Adaptation Research Collaborative				1			General Health	1	Yes (First Nations communities)	Isi Askiwan - The State of the Land: Prince Albert Grand Council Elders' Forum on Climate Change
Territorial	Northwest Territories	Northern	NWT Health Status Report	2008	Department of Health and Social Services (HSS)				1			General Health	1	Yes	NWT Climate Change Impacts and Adaptation Report
Territorial	Northwest Territories	Northern	NWT Climate Change Impacts and Adaptation Report	2008	NWT Environment and Natural Resources		1				1	General Health	1	Yes	NWT Climate Change Impacts and Adaptation Report
Territorial	Northwest Territories	Northern	Healthy Active Living Strategy	2008	NWT Department of Health and Social Servies (HSS), Government of Nunavut, Public Health Agency of Canada			1				General Health	2	Yes	NWT Climate Change Impacts and Adaptation Report
Territorial	Nunavut	Northern	Drinking water supply vulnerability analyses	2011	Government of Nunavut				1			Food- and water-borne infectious diseases	1	No	Upagiaqtavut Setting the Course: Climate Change Impacts and Adaptation in Nunavut
Territorial	Nunavut	Northern	Climate change adaptation plan	2011	Government of Nunavut		1					General Health	1	Not specified	Upagiaqtavut Setting the Course: Climate Change Impacts and Adaptation in Nunavut
Territorial	Nunavut	Northern	Incorporate climate change considerations into emergency planning, working with all stakeholders	2011	Government of Nunavut		1					General Health	2	Not specified	Upagiaqtavut Setting the Course: Climate Change Impacts and Adaptation in Nunavut
Territorial	Yukon	Northern	Assisting communities in developing emergency response plans, identify potential new threats	2009	Yukon Government	1						General Health	1	No	Yukon Government Climate Change Action Plan
Territorial	Yukon	Northern	Monitoring health trends to identify and develop responses	2009	Yukon Government				1			General Health	1	No	Yukon Government Climate Change Action Plan
Territorial	Yukon	Northern	Climate Change adaptation plan	2009	Yukon Government		1					General Health	1	Not specified	Yukon Government Climate Change Action Plan
Municipal	Edmonton	n/a	Climate Change Adaptation Plan	2011	City of Edmonton		1					General Health	1	Not specified	The Way We Green: The City of Edmonton's Environmental Strategic Plan
Municipal	Edmonton	n/a	Emergency response plans for severe weather events	2011	City of Edmonton		1					Storms	2	Not specified	The Way We Green: The City of Edmonton's Environmental Strategic Plan
Municipal	Montreal	n/a	Contingency plans for extreme climatic conditions responsible for flooding or damaged infrastructure	2014	Ville de Montréal, Emergency Preparedness Centre		1					Multiple: floods and storms	2	Not specified	Adaptation aux chagnements climatiques	http://ville.montreal.qc.ca/portal/page?_pageid=7237,75085661&_dad=portal&_schema=PORTAL
Municipal	Montreal	n/a	Contingency plans for the emergence of West Nile Virus	2014	Ville de Montréal, Emergency Preparedness Centre		1					Vector-borne infectious diseases (WNV)	2	Not specified	Adaptation aux chagnements climatiques	http://ville.montreal.qc.ca/portal/page?_pageid=7237,75085661&_dad=portal&_schema=PORTAL
Municipal	Montreal	n/a	Contingency plans for the increase in heat waves	2014	Ville de Montréal, Emergency Preparedness Centre		1					Heat-related	2	Not specified	Adaptation aux chagnements climatiques	http://ville.montreal.qc.ca/portal/page?_pageid=7237,75085661&_dad=portal&_schema=PORTAL
Municipal	Ottawa	n/a	Heat island controlling methods (garden, reflective or green roofs, reflective parking surfaces, and encouragement of tree planting)	2004	City of Ottawa			1				Multiple: Heat-related and UV Radiation	2	No	Air Quality & Climate Change Management Plan
Municipal	Ottawa	n/a	West Nile disease control measures (e.g. spraying at larval state)	2004	City of Ottawa			1				Vector-borne infectious diseases (WNV)	2	No	Air Quality & Climate Change Management Plan
Municipal	Ottawa	n/a	Emergency preparedness	2004	City of Ottawa		1					General Health	2	Not specified	Air Quality & Climate Change Management Plan
Municipal	Ottawa	n/a	Set-up/enhance ambient air quality monitoring program	2004	City of Ottawa					1		Air Quality	2	Not specified	Air Quality & Climate Change Management Plan
Municipal	Ottawa	n/a	Smog Alerts	2004	City of Ottawa					1		Air Quality	2	Not specified	Air Quality & Climate Change Management Plan
Municipal	Ottawa	n/a	Heat alert	2004	City of Ottawa					1		Heat-related	2	Yes	Air Quality & Climate Change Management Plan
Municipal	Ottawa	n/a	Air Quality and Climate Change Management Plan	2004	City of Ottawa		1					General Health	1	Yes (children, elderly, those with underlying illnesses)	Air Quality & Climate Change Management Plan
Municipal	Toronto	n/a	Air quality health index	2011	Toronto Public Health					1		Air quality	2	No	Toronto's Adaptation Actions
Municipal	Toronto	n/a	Doubling tree canopy to reduce urban heat island effect and provide shade	2011	Parks, Forestry and Recreation; Transportation Services			1				Multiple: Heat-related and UV Radiation	2	No	Toronto's Adaptation Actions
Municipal	Toronto	n/a	Flood Warning Forecasting	2011	Toronto and Region Conservation Authority					1		Floods	2	No	Toronto's Adaptation Actions
Municipal	Toronto	n/a	Shade policy and guidelines	2011	Toronto Public Health; Parks, Forestry and Recreation		1					Multiple: Heat-related and UV Radiation	2	No	Toronto's Adaptation Actions
Municipal	Toronto	n/a	Heat alert system and hot weather response plan	2011	Toronto Public Health		1			1		Heat-related	2	Not specified	Toronto's Adaptation Actions
Municipal	Toronto	n/a	Provide indoor cooling centres and outdoor cooling stations	2011	Parks, Forestry & Recreation; Toronto and Region Conservation Authority			1				Heat-related	2	Not specified	Toronto's Adaptation Actions
Municipal	Toronto	n/a	Spatial Heat Vulnerability Assessment	2011	Toronto Public Health				1			Heat-related	1	Not specified	Toronto's Adaptation Actions
Municipal	Toronto	n/a	Toronto food strategy	2011	Toronto Public Health	1						Food Security	1	Not specified	Toronto's Adaptation Actions
Municipal	Toronto	n/a	Urban heat island research	2011	City Planning; Clean Air Partnership; Toronto Environment Office; Toronto Public Health				1			Heat-related	2	Not specified	Toronto's Adaptation Actions
Municipal	Toronto	n/a	Climate Change Adaptation Plan	2008	City of Toronto		1					General Health	1	Yes	Ahead of the Storm: Preparing Toronto for Climate Change
Municipal	Toronto	n/a	Climate change and health equity workshop	2011	Toronto Public Health	1						General Health	1	Yes	Toronto's Adaptation Actions
Municipal	Vancouver	n/a	Expand the extreme hot weather preparedness work program	2012	City of Vancouver		1					Heat-related	1	n/a	City of Vancouver Climate Change Adaptation Strategy
Municipal	Vancouver	n/a	Urban heat island effect mapping	2012	City of Vancouver				1			Heat-related	1	n/a	City of Vancouver Climate Change Adaptation Strategy
Municipal	Vancouver	n/a	Expand public access to drinking water	2012	City of Vancouver			1				Heat-related	2	No	City of Vancouver Climate Change Adaptation Strategy
Municipal	Vancouver	n/a	Target green space and trees in hot areas (in urban heat islands)	2012	City of Vancouver			1				Heat-related	2	No	City of Vancouver Climate Change Adaptation Strategy
Municipal	Vancouver	n/a	Assess cooling capacity of cool refuges	2012	City of Vancouver				1			Heat-related	1	Not specified	City of Vancouver Climate Change Adaptation Strategy
Municipal	Vancouver	n/a	'Be Cool' communication campaign	2012	City of Vancouver	1						Heat-related	2	Not specified	City of Vancouver Climate Change Adaptation Strategy
Municipal	Vancouver	n/a	Explore the potential for cooling rooms in non-market housing	2012	City of Vancouver				1			Heat-related	1	Not specified	City of Vancouver Climate Change Adaptation Strategy
Municipal	Vancouver	n/a	Heat Alert	2012	City of Vancouver					1		Heat-related	2	Not specified	City of Vancouver Climate Change Adaptation Strategy
Municipal	Vancouver	n/a	Climate Change Adaptation Strategy	2012	City of Vancouver		1					General Health	1	Yes	City of Vancouver Climate Change Adaptation Strategy
Municipal	Vancouver	n/a	Develop cool refuges	2012	City of Vancouver			1				Heat-related	2	Yes	City of Vancouver Climate Change Adaptation Strategy
Municipal	Vancouver	n/a	Research transportation to cool facilities for those in need	2012	City of Vancouver				1			Heat-related	1	Yes	City of Vancouver Climate Change Adaptation Strategy
Municipal	Vancouver	n/a	Vulnerable population mapping (with the Coastal Communities at Risk research group)	2012	City of Vancouver				1			General Health	1	Yes	City of Vancouver Climate Change Adaptation Strategy
Municipal	Vancouver	n/a	Include instances for mould in new online rental database	2012	City of Vancouver			1				Air Quality	2	Yes (low-income populations)	City of Vancouver Climate Change Adaptation Strategy
Municipal/Health Region	Vancouver	n/a	Create education campaign on mould with local health region	2012	City of Vancouver and Vancouver Coastal Health	1						Air Quality	2	Yes (low-income populations)	City of Vancouver Climate Change Adaptation Strategy

## Sheet: References
Biagini, B.; Bierbaum, R.; Stults, M.; Dobardzic, S.; McNeeley, S.M. A typology of adaptation actions: A global look at climate adaptation actions financed through the global environment facility. Global Environmental Change 2014.
Smith, K.R.; Woodward, A.; Campbell-Lendrum, D.; Chadee, D.D.; Honda, Y.; Liu, Q.; Olwoch, J.M.; Revich, B.; Sauerborn, R. Human health: Impacts, adaptation, and co-benefits. In Climate change 2014: Impacts, adaptation, and vulnerability. Part a: Global and sectoral aspects. Contribution of working group ii to the fifth assessment report of the intergovernmental panel of climate change, Field, C.…
